# Supplementary material for: Antioxidative Activity Evaluation of High Purity and Micronized Tartary Buckwheat Flavonoids Prepared by Antisolvent Recrystallization
Source: Foods. 2022 May 5;11(9):1346. doi: 10.3390/foods11091346 (PMC9102898; doi:10.3390/foods11091346)
Supplement: Supplementary file 1 [file foods-11-01346-s001.zip › foods-1681692-supplementary.pdf]

# Antioxidative activity evaluation of high purity and micronized tartary buckwheat flavonoids prepared by antisolvent recrystallization

Yanjie Liu <sup>1,2,3</sup>, Xiaoyu Sui<sup>4\*</sup>, Xiuhua Zhao <sup>1,2,3,\*</sup>, Siying Wang <sup>1,2,3</sup> and Qilei Yang <sup>1,2,3</sup>

<sup>1</sup> College of Chemistry, Chemical Engineering and Resource Utilization, Northeast Forestry University, Harbin 150040, China; klp15lyj@nefu.edu.cn (Y.L.); wsy0822@nefu.edu.cn (S.W.); yql@nefu.edu.cn (Q.Y.); zhangxiaoxue@nefu.edu.cn (X.Z.)  
<sup>2</sup> Key Laboratory of Forest Plant Ecology, Ministry of Education, Northeast Forestry University, Harbin 150040, China  
<sup>3</sup> Heilongjiang Provincial Key Laboratory of ecological utilization of Forestry-based active substances, Northeast Forestry University, Harbin 150040, China  
<sup>4</sup> College of Pharmacy, Qiqihar Medical University, Qiqihar 161006, China  
\* Correspondence: suixiaoyu@outlook.com, xiuhuazhao@nefu.edu.cn

**Table S1.** Constituents and concentrations of the various simulated juices used in in vitro human digestion model.

|                                  | Saliva (Step I)                 | Gastric juice (Step II)                              | Duodenal juice (Step III)                           | Bile juice (Step IV)                                 |
|----------------------------------|---------------------------------|------------------------------------------------------|-----------------------------------------------------|------------------------------------------------------|
| Organic and inorganic components | 1.7 mL NaCl (175.3 g/L)         | 6.5 mL HCl (37 g/L)                                  | 6.3 mL KCl (89.6 g/L)                               | 68.3 mL NaHCO <sub>3</sub> (84.7 g/L)                |
|                                  | 8 mL urea (25 g/L)              | 18 mL CaCl <sub>2</sub> 2H <sub>2</sub> O (22.2 g/L) | 9 mL CaCl <sub>2</sub> 2H <sub>2</sub> O (22.2 g/L) | 10 mL CaCl <sub>2</sub> 2H <sub>2</sub> O (22.2 g/L) |
|                                  | 15 mg uric acid                 | 1 g bovine serum albumin                             | 1 g bovine serum albumin                            | 1.8 g bovine serum albumin<br>30 g bile              |
| Enzymes                          | 290 mg α-amylase<br>25 mg mucin | 2.5 g pepsin<br>3 g mucin                            | 9 g pancreatin<br>1.5 g lipase                      |                                                      |
| pH                               | 6.8 ± 0.2                       | 1.50 ± 0.02                                          | 8.0 ± 0.2                                           | 7.0 ± 0.2                                            |

After mixing all ingredients, the volume was augmented to 500 mL with distilled water. If necessary, the pH of the juices was adjusted to the appropriate value.
